# Supplementary material for: Iron uptake controls the generation of Leishmania infective forms through regulation of ROS levels
Source: PubMed Central journal article supplement — J Exp Med. 2013 Feb 11;210(2):401–16. doi: 10.1084/jem.20121368 (PMC3570109; doi:10.1084/jem.20121368), 2013-02-11
Supplement: supp_jem.20121368_JEM_20121368_sm.pdf [file supp_jem.20121368_JEM_20121368_sm.pdf]

## SUPPLEMENTAL MATERIAL

Mittra et al., <http://www.jem.org/cgi/content/full/jem.20121368/DC1>**Table S1.** Primers used for qPCR reactions

| Gene                               | Forward primer                 | Reverse primer                  |
|------------------------------------|--------------------------------|---------------------------------|
| <i>UbH</i> LmxM.08_29.2300         | 5'-AACGTGAACAACGGATGTGCGTC-3'  | 5'-ATGGTACCAAGCTTGACACATGCC-3'  |
| <i>LIT1</i> LmxM.30.3070           | 5'-TATGTGTTCTCCGTGGCGAAGTCT-3' | 5'-CACAGCAATCAGGGCAAGCAAGAA-3'  |
| <i>LFR1</i> LmxM.29.1610           | 5'-GCAACGTGCTTTGTCAACCTGAGA-3' | 5'-ATCTCGGCATTCAGCCTCACATCT-3'  |
| <i>CPB</i> LmxM.08.1070            | 5'-TCAAGGTGAACGAGTGCCACAAGA-3' | 5'-AAGTACGGCGAGCACTTACCATCA-3'  |
| <i>ATG8</i> LmxM.19.1630           | 5'-ACAAGAGCAAGTCTTGGTACCGC-3'  | 5'-AGGTCGCTCATGAGAGTGCTGTT-3'   |
| <i>ATG8A</i> LmxM.19.0870          | 5'-ACATCTTCGACGCCTTCAAGCA-3'   | 5'-GGAGCCAAGCAGGTTTGGGTATT-3'   |
| <i>ATG4.1</i> LmxM.31.3890         | 5'-AAAGGAGAGGATATCGCGGCTGTT-3' | 5'-ACCTTGTGCGTGAAAGGCAATCAG-3'  |
| <i>APX</i> LmxM.33.0070            | 5'-TGCGGTGAATGCCACATCAAGTTC-3' | 5'-AAGCATCATCAGCTTCGTCGTTGC-3'  |
| <i>Amastin-like 1</i> LmxM.08.0760 | 5'-AGGTGTGATGTGCTGAACGACGAT-3' | 5'-ACGGGAGCATCAGGAAGATGATGT-3'  |
| <i>Amastin-like 2</i> LmxM.08.0770 | 5'-CATCTTCGTGTACGGCTTTGCGTT-3' | 5'-TTCGGTAAGTCACCACCATGAGCA-3'  |
| <i>P27</i> LmxM.28.0980            | 5'-TTACCGCTCCGCTATAACGTGCT-3'  | 5'-ACCACCCGTGTAGATCAGACAA-3'    |
| ribosomal 60S L5 LmxM.34.1900      | 5'-GTGCTGCAGGACAAGACGAAGTTT-3' | 5'-TGCACAATGATGTCCTTGTTCTGTG-3' |
| eIF-3 subunit LmxM.36.3880         | 5'-TCAAGACGCCCTTACCACCTTCT-3'  | 5'-AGCGGTTAATCACCTCGTTCTCGT-3'  |

**Table S2.** SL RNA-seq analysis of *L. amazonensis* promastigotes cultured with or without iron

| Gene ID         | Product description                                          | Rep 1           |                 | Rep 2           |                 | Fold change |       |                  | P-value |
|-----------------|--------------------------------------------------------------|-----------------|-----------------|-----------------|-----------------|-------------|-------|------------------|---------|
|                 |                                                              | Fe <sup>+</sup> | Fe <sup>-</sup> | Fe <sup>+</sup> | Fe <sup>-</sup> | Rep 1       | Rep 2 | log <sub>2</sub> |         |
| LmxM.08_29.0620 | ABC transporter, putative                                    | 4,451           | 95,447          | 17,859          | 97,488          | 7.88        | 4.16  | 2.60             | 0.00    |
| LmxM.30.3070    | iron/zinc transporter protein [LIT1]                         | 75              | 870             | 148             | 1,244           | 4.26        | 6.40  | 2.48             | 0.00    |
| LmxM.29.1610    | ferric reductase [LFR1]                                      | 47              | 427             | 179             | 1,472           | 3.34        | 6.26  | 2.42             | 0.00    |
| LmxM.04.0200    | surface antigen-like protein                                 | 6               | 77              | 20              | 137             | 4.72        | 5.22  | 2.37             | 0.00    |
| LmxM.30.1190    | hypothetical protein, unknown function                       | 68              | 843             | 176             | 964             | 4.56        | 4.17  | 2.23             | 0.00    |
| LmxM.14.1360    | myo-inositol-1-phosphate synthase                            | 761             | 9,029           | 2,204           | 11,416          | 4.36        | 3.95  | 2.15             | 0.00    |
| LmxM.33.1730    | unspecified product                                          | 11              | 93              | 46              | 267             | 3.11        | 4.42  | 2.02             | 0.00    |
| LmxM.25.1700    | hypothetical protein, conserved                              | 4               | 83              | 44              | 184             | 7.62        | 3.19  | 1.98             | 0.00    |
| LmxM.19.0870    | ATG8/AUT7/APG8/PAZ2, putative                                | 88              | 866             | 290             | 1,395           | 3.62        | 3.66  | 1.96             | 0.00    |
| LmxM.23.1680    | hypothetical protein, conserved                              | 20              | 407             | 645             | 2,862           | 7.48        | 3.38  | 1.95             | 0.01    |
| LmxM.08.0760    | amastin-like protein, putative                               | 5               | 41              | 26              | 120             | 3.01        | 3.52  | 1.75             | 0.01    |
| LmxM.28.0980    | hypothetical protein, conserved [P27]                        | 9               | 104             | 61              | 166             | 4.25        | 2.07  | 1.45             | 0.01    |
| LmxM.09.0150    | ATG8/AUT7/APG8/PAZ2, putative [ATG8C.1]                      | 20              | 104             | 30              | 306             | 1.91        | 7.77  | 2.14             | 0.00    |
| LmxM.19.0820    | ATG8/AUT7/APG8/PAZ2, putative                                | 509             | 3,025           | 1,164           | 3,771           | 2.18        | 2.47  | 1.31             | 0.01    |
| LmxM.24.1260    | amastin-like surface protein-like protein                    | 16              | 98              | 60              | 189             | 2.25        | 2.40  | 1.29             | 0.02    |
| LmxM.24.1270    | amastin-like surface protein-like protein                    | 107             | 733             | 272             | 643             | 2.52        | 1.80  | 1.22             | 0.01    |
| LmxM.08.0770    | amastin-like protein, putative                               | 5               | 20              | 20              | 67              | 1.47        | 2.55  | 1.12             | 0.08    |
| LmxM.08.1080    | cathepsin L-like protease, putative                          | 198             | 1,726           | 867             | 1,590           | 3.20        | 1.40  | 1.15             | 0.03    |
| LmxM.08.1070    | cathepsin L-like protease, putative                          | 5               | 34              | 22              | 46              | 2.50        | 1.59  | 0.97             | 0.11    |
| LmxM.29.0270    | AUT2/APG4/ATG4 cysteine peptidase, putative                  | 27              | 126             | 83              | 201             | 1.71        | 1.84  | 0.92             | 0.08    |
| LmxM.36.3880    | eukaryotic translation initiation factor 3 subunit, putative | 711             | 642             | 1,518           | 595             | 0.33        | 0.30  | -1.55            | 0.00    |
| LmxM.34.1230    | short chain dehydrogenase, putative                          | 1,955           | 1,668           | 2,901           | 1,240           | 0.31        | 0.33  | -1.55            | 0.01    |
| LmxM.34.1430    | 60S ribosomal protein L2, putative                           | 301             | 255             | 528             | 220             | 0.31        | 0.32  | -1.56            | 0.00    |
| LmxM.34.1540    | reiske iron-sulfur protein precursor, putative               | 3,296           | 2,613           | 5,840           | 2,235           | 0.29        | 0.29  | -1.67            | 0.00    |
| LmxM.26.0010    | brix domain containing-like protein                          | 266             | 191             | 534             | 217             | 0.26        | 0.31  | -1.71            | 0.00    |
| LmxM.05.0140    | nucleolar RNA helicase II, putative                          | 657             | 501             | 1,516           | 533             | 0.28        | 0.27  | -1.76            | 0.00    |
| LmxM.36.2360    | tyrosine aminotransferase, putative                          | 1,882           | 1,576           | 5,875           | 1,883           | 0.31        | 0.24  | -1.77            | 0.00    |
| LmxM.08_29.0030 | ribosomal protein L3-like protein                            | 11              | 9               | 62              | 20              | 0.30        | 0.25  | -1.86            | 0.00    |
| LmxM.07.0040    | hypothetical protein, conserved                              | 65              | 37              | 80              | 30              | 0.21        | 0.29  | -1.97            | 0.00    |
| LmxM.07.0800    | flavoprotein subunit-like protein                            | 190             | 138             | 517             | 141             | 0.27        | 0.21  | -1.98            | 0.00    |
| LmxM.25.0920    | hypothetical protein, conserved                              | 275             | 115             | 230             | 98              | 0.15        | 0.32  | -2.24            | 0.00    |
| LmxM.14.0080    | hypothetical protein, conserved                              | 36              | 14              | 32              | 12              | 0.14        | 0.29  | -2.32            | 0.00    |
| LmxM.32.1140    | hypothetical protein, conserved                              | 8,979           | 5,067           | 19,944          | 3,804           | 0.21        | 0.15  | -2.38            | 0.00    |
| LmxM.08.0290    | iron superoxide dismutase                                    | 320             | 105             | 564             | 175             | 0.12        | 0.24  | -2.48            | 0.00    |

**Table S2.** SL RNA-seq analysis of *L. amazonensis* promastigotes cultured with or without iron (*Continued*)

| Gene ID      | Product description                                 | Rep 1           |                 | Rep 2           |                 | Fold change |       |                  | P-value |
|--------------|-----------------------------------------------------|-----------------|-----------------|-----------------|-----------------|-------------|-------|------------------|---------|
|              |                                                     | Fe <sup>+</sup> | Fe <sup>-</sup> | Fe <sup>+</sup> | Fe <sup>-</sup> | Rep 1       | Rep 2 | log <sub>2</sub> |         |
| LmxM.30.1200 | hypothetical protein, unknown function              | 1,347           | 644             | 3,783           | 661             | 0.18        | 0.13  | -2.60            | 0.00    |
| LmxM.36.4520 | hypothetical protein, conserved                     | 66              | 21              | 33              | 14              | 0.12        | 0.32  | -2.60            | 0.00    |
| LmxM.02.0460 | hypothetical protein, conserved                     | 788             | 124             | 1,078           | 196             | 0.06        | 0.14  | -3.45            | 0.00    |
| LmxM.34.3890 | calmodulin-like protein, EF hand containing protein | 170             | 24              | 37              | 14              | 0.05        | 0.29  | -3.71            | 0.00    |
| LmxM.18.0510 | aconitase, putative                                 | 976             | 102             | 309             | 121             | 0.04        | 0.30  | -3.81            | 0.00    |
| LmxM.05.1030 | hypothetical protein, conserved                     | 348             | 21              | 52              | 19              | 0.02        | 0.28  | -4.68            | 0.00    |

The Gene ID and product description are from TriTrypDB version 4.0, with additional annotation added in brackets, e.g. [LIT1]. Genes in bold encode proteins discussed throughout the paper. The columns labeled Rep 1 and Rep 2 contain the raw number of reads mapped to each gene for replicate-independent cultures of promastigotes grown in medium with (Fe<sup>+</sup>) or without (Fe<sup>-</sup>) iron. The fold change columns numbers for Rep 1 and Rep 2 represent the median-normalized ratio of reads from the Fe<sup>+</sup>/Fe<sup>-</sup> libraries. The log<sub>2</sub> fold change and p-values were calculated by edgeR. The first 11 rows show all genes with threefold or greater up-regulation in both replicates, whereas the bottom 20 rows show those with threefold or greater down-regulation. Genes in the middle were selected from those that showed less consistent up-regulation but were confirmed by qPCR.
